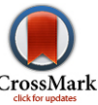

# MiR393 Regulation of Auxin Signaling and Redox-Related Components during Acclimation to Salinity in Arabidopsis

María José Iglesias<sup>1</sup>, María Cecilia Terrile<sup>1,3</sup>, David Windels<sup>4,5</sup>, María Cristina Lombardo<sup>2</sup>, Carlos Guillermo Bartoli<sup>4</sup>, Franck Vazquez<sup>3</sup>, Mark Estelle<sup>5,6</sup>, Claudia Anahí Casalongue<sup>1\*</sup>

**1** Instituto de Investigaciones Biológicas, UE-CONICET-UNMDP, Facultad de Ciencias Exactas y Naturales, Universidad Nacional de Mar del Plata, Mar del Plata, Argentina, **2** Departamento de Biología e Instituto de Investigaciones Biológicas, UE-CONICET-UNMDP, Facultad de Ciencias Exactas y Naturales, Universidad Nacional de Mar del Plata, Mar del Plata, Argentina, **3** Botanical Institute of the University of Basel, Zürich-Basel Plant Science Center, Part of the Swiss Plant Science Web, Department of Environmental Sciences, Basel, Switzerland, **4** Instituto de Fisiología Vegetal, Facultad de Ciencias Naturales, Universidad Nacional de La Plata-CCT La Plata CONICET, La Plata, Argentina, **5** Section of Cell and Developmental Biology, University of California San Diego, San Diego, California, United States of America, **6** Howard Hughes Medical Institute, University of California San Diego, San Diego, California, United States of America

## Abstract

One of the most striking aspects of plant plasticity is the modulation of development in response to environmental changes. Plant growth and development largely depend on the phytohormone auxin that exerts its function through a partially redundant family of F-box receptors, the TIR1-AFBs. We have previously reported that the Arabidopsis double mutant *tir1afb2* is more tolerant to salt stress than wild-type plants and we hypothesized that down-regulation of auxin signaling might be part of Arabidopsis acclimation to salinity. In this work, we show that NaCl-mediated salt stress induces miR393 expression by enhancing the transcription of *AtMIR393A* and leads to a concomitant reduction in the levels of the TIR1 and AFB2 receptors. Consequently, NaCl triggers stabilization of Aux/IAA repressors leading to down-regulation of auxin signaling. Further, we report that miR393 is likely involved in repression of lateral root (LR) initiation, emergence and elongation during salinity, since the *mir393ab* mutant shows reduced inhibition of emergent and mature LR number and length upon NaCl-treatment. Additionally, *mir393ab* mutant plants have increased levels of reactive oxygen species (ROS) in LRs, and reduced ascorbate peroxidase (APX) enzymatic activity compared with wild-type plants during salinity. Thus, miR393 regulation of the TIR1 and AFB2 receptors could be a critical checkpoint between auxin signaling and specific redox-associated components in order to coordinate tissue and time-specific growth responses and tolerance during acclimation to salinity in Arabidopsis.

**Citation:** Iglesias MJ, Terrile MC, Windels D, Lombardo MC, Bartoli CG, et al. (2014) MiR393 Regulation of Auxin Signaling and Redox-Related Components during Acclimation to Salinity in Arabidopsis. PLoS ONE 9(9): e107678. doi:10.1371/journal.pone.0107678

**Editor:** Abidur Rahman, Iwate University, Japan

**Received:** March 17, 2014; **Accepted:** August 15, 2014; **Published:** September 15, 2014

**Copyright:** © 2014 Iglesias et al. This is an open-access article distributed under the terms of the Creative Commons Attribution License, which permits unrestricted use, distribution, and reproduction in any medium, provided the original author and source are credited.

**Data Availability:** The authors confirm that all data underlying the findings are fully available without restriction. All data are included within the manuscript.

**Funding:** The work in the laboratory of CAC is supported by CONICET (grant PIP 0292 to CAC; grant PIP 0202 to MCT), Mar del Plata National University and ANPCyT-Ministry of Science and Technology (grant PICT 1167 to MCT), Argentina. The work in the laboratory of FV is supported by grants of the Swiss National Science Foundation (PZ00P3\_126329 and PZ00P3\_142106). Work in the laboratory of ME is supported by grants from the National Institutes of Health (NIH) (GM 43644), The Howard Hughes Medical Institute and the Gordon and Betty Moore Foundation. The funders had no role in study design, data collection and analysis, decision to publish, or preparation of the manuscript.

**Competing Interests:** The authors have declared that no competing interests exist.

\* Email: casalong@mdp.edu.ar

These authors contributed equally to this work.

## Introduction

Soil salinity is one of the most significant abiotic stresses to crop productivity worldwide [1]. Therefore, elucidation of plant acclimation to salinity has become a main issue in plant physiology. The rapid perception of salinity and accurate relay of environmental signals to switch on adaptive developmental responses are essential for plant survival under conditions of high salinity. In this context, auxin, which is an established growth regulator, is emerging as a new player in plant responses to biotic and abiotic stresses [2,3].

The natural auxin, indole-3-acetic acid (IAA) modulates gene expression through direct physical interaction with the TIR1/AFBs auxin receptor (TAAR) proteins resulting in the targeted

degradation of Aux/IAA transcriptional repressor proteins via the SCF E3-ubiquitin ligase proteasome pathway [4,5,6,7,8]. Recent findings demonstrated that TAARs have distinct biochemical and biological functions and exhibit a complex post-transcriptional regulation [9,10,11]. *MiR393* and the secondary siRNAs have been implicated in down-regulation of TAARs expression in Arabidopsis [11,12,13,14,15].

Reactive oxygen species (ROS) and hormones are key elements in intricate switches used by plants to trigger highly dynamic responses to changing environment. Although ROS may have deleterious effects in the cells, they also act as signal transduction molecules involved in mediating responses to environmental stresses [16]. Plant plasticity in response to the environment is linked to a complex signaling module in which ROS and

antioxidants operate together with hormones, including auxin [17]. We previously reported the involvement of TAARs in the plant adaptive response to oxidative and salinity stresses. The auxin resistant double mutant *tir1 afb2* showed increased tolerance to salinity measured by chlorophyll content, germination rate and root elongation. In addition, mutant plants displayed reduced hydrogen peroxide (H<sub>2</sub>O<sub>2</sub>) and superoxide anion (O<sub>2</sub><sup>-</sup>) levels, as well as enhanced antioxidant metabolism [18]. Microarray analyses indicated that auxin responsive genes are repressed by different stresses such as, wounding, oxidative, selenium, and salt treatments in *Arabidopsis* and rice [19,20,21]. More recently, the transcriptomic data of Blomster et al. [22] showed that various aspects of auxin homeostasis and signaling are modified by apoplastic ROS. Together, these findings suggest that the suppression of auxin signaling might be a strategy that plants use to enhance their tolerance to abiotic stress including salinity. However, whether auxin signaling is repressed as a result of salt stress and how stress-related signals and plant development are integrated by a ROS-auxin crosstalk is still in its beginning.

Here, we show that salinity triggers miR393 expression which leads to a repression of TIR1 and AFB2 receptors. Furthermore, down-regulation of auxin signaling by miR393 was demonstrated to mediate the repression of LR initiation, emergence and elongation during salinity. Additionally, the *mir393ab* mutant showed increased levels of reactive oxygen species (ROS) due to reduced ascorbate peroxidase (APX) enzymatic activity. Altogether these experiments lead us to propose a hypothetical model to explain how salt stress might suppress TIR1/AFB2-mediated auxin signaling thus integrating stress signals, redox state and physiological growth responses during acclimation to salinity in *Arabidopsis* plants.

## Materials and Methods

### Plant Material and Growth Conditions

*Arabidopsis thaliana* wild-type (WT) and mutants *tir1-1* [23], *tir1-1 afb2-3* [24], *ago1-27* [25] and *mir393ab* [26], are in the Columbia (Col-0) ecotype. *Arabidopsis* transgenic lines *BA3pro:GUS*, *DR5pro:GUS*, *HSpro:AXR3NT-GUS*, *TIR1pro:TIR1-GUS*, *TIR1pro:mTIR1-GUS*, *AtMIR393Apro:GUS*, *AtMIR393Bpro:GUS*, *35Spro:TIR1-Myc*, *mir393ab HSpro:AXR3NT-GUS* and *mir393ab DR5pro:GUS* were previously described [4,9,26,27,28,29].

Seeds were surface-sterilized and stratified at 4°C in the dark for 2 d. Then, seeds were plated on *Arabidopsis thaliana* Salt (ATS) medium [30] plus 1% (w/v) sucrose and 0.8% (w/v) agar and grown vertically at 23°C under 120 μmol photons m<sup>-2</sup> s<sup>-1</sup> with 16: 8 h light: dark cycles.

For lateral roots (LRs) assays, 4 days post-germination (dpg) seedlings growing on ATS agar medium on vertical plates were transferred onto fresh media containing NaCl for additional 5–7 d, after which the number of emergent and mature LR was measured according to Malamy and Benfey [31]. Alternatively, 4 dpg seedlings were transferred from auxin-free medium onto 85 nM indole acetic acid (IAA) or 85 nM 2,4-D and LR were counted after 3 d as previously described by Dharmasiri et al. [6]. Since IAA, is susceptible to photolysis under blue and ultraviolet light, for IAA-treatment plants were grown under yellow light as described by Rahman et al. [32].

For rosette diameter measurements, plants were grown in ATS medium supplemented with 75 mM NaCl in horizontal position for 12 d. Rosette area was determined by finding the minimal area that contained all leaves using ImageJ as image-analysis software (<http://rsbweb.nih.gov/ij/>).

Unless stated otherwise, seedlings were grown on ATS medium in vertical position and then transferred to liquid ATS medium supplemented with NaCl for designated times.

### GUS Staining

Transgenic lines were transferred into liquid ATS medium containing NaCl or IAA and then incubated with mild shaking at 23°C for 2–4 h. After treatment, seedlings were fixed in 90% (v/v) acetone at 20°C for 1 h, washed twice in 50 mM sodium phosphate buffer pH 7.0 and incubated in staining buffer [50 mM Na phosphate (pH 7.0), 5 mM EDTA, 0.1% (v/v) Triton X-100, 5 mM K<sub>4</sub>Fe(CN)<sub>6</sub>, 0.5 mM K<sub>3</sub>Fe(CN)<sub>6</sub> and 1 mg/ml X-Gluc (GBT)] at 37°C from 2 h to overnight. Bright-field images were taken using a Nikon SMZ800 magnifier.

Specifically, *HSpro:AXR3NT-GUS* seedlings were induced in liquid ATS medium at 37°C for 2 h and then treated with NaCl at 23°C.

For the analysis of GUS expression in cross sections of primary roots, seedlings were included in a paraffin matrix (Paraplast) at 60°C after GUS staining. Roots were cut into 5 μm sections using a Minot type rotary microtome Zeiss HYRAX M 15. Section were deparaffined with xylene, mounted with Entellan (Merk) and observed by bright field microscopy in an Olympus CX21 microscope. Images were captured using a digital camera attached to the microscope. The arrangement of cells in the cross section of primary roots was evaluated according to Malamy and Benfey [31]. Densitometric analysis of GUS expression was conducted by scanning blue vs total pixels of the different tissues using Matrox Inspector 2.2 software (Matrox Electronics Systems, Ltd). The control value was arbitrarily set to 1 in each case.

### Protein Gel Blot Analysis

Seven dpg *tir1-1 35S:TIR1-Myc* plants were transferred to liquid ATS medium supplemented with 200 mM NaCl for different times. After treatments, plants were homogenized in ice-cold buffer [50 mM 2-amino-2-(hydroxymethyl)-1,3-propanediol (TRIS) pH 7.5, 200 mM NaCl, 10% (v/v) glycerol, 0.1% (v/v) Tween-20], containing 1 mM phenylmethylsulfonyl fluoride (PMSF) and complete protease inhibitor cocktail (Roche) and centrifuged twice at 10,000 g at 4°C for 15 min. Equal amounts of protein were loaded onto SDS-PAGE and blotted onto the nitrocellulose membrane. Membranes were incubated with anti-c Myc antibody (Sigma) and goat anti-mouse alkaline phosphatase conjugate (Sigma) was used as secondary antibody. Then, Myc detection was visualized with NBT and BCIP (Promega). Densitometry analysis of immunoblots was performed using Matrox Inspector 2.2 software (Matrox Electronics Systems, Ltd).

### RNA Preparation and RNA-analysis

Total RNA was isolated using TRIzol reagent (Invitrogen). RNA samples were assessed for purity via their A<sub>260</sub>/A<sub>280</sub> ratios and integrity by resolving 1 μg of total RNA on a 1.2% (w/v) denaturing agarose gel. For each sample, a normalization of RNA for RT was performed by density measurement of each 28S ribosomal RNA band. Total RNA (1 μg) was reverse transcribed with ImProm-II Reverse Transcription System (Promega) following the manufacturer's protocol. The level of transcript was determined by RT-PCR using the following primers: *TIR1* (*TIR1-F* 5'-GATGGTCTCGCTGCTATCG-3' and *TIR1-R* 5'-GGTTGAAGCAAGCACCTCA-3'), *AFB2* (*AFB2-F* 5'-CTGCCAACAAATGACAAAACG-3' and *AFB2-R* 5'-ATC-CATTCTTGTCCCAACCA-3'), *GUS* (*GUS-F* 5'-GGCACAG-CACATCAAAGAGA-3' and *GUS-R* 5'-CTGATAGCGCGT-GACAAAAA-3'), *ACT2* (*ACT-F* 5'-AAACCCTCGTAGATT-

GGCACA-3' and ACT2-R 5'-AAACCCTCGTAGATTGG-CACA-3'). Conditions were optimized for all semi-quantitative RT-PCR reactions to ensure linearity of response for comparison between samples.

RNA-blotting was done according to Si-Ammour et al. [33].

### Chlorophyll Content

Seven dpg seedlings were transferred into liquid ATS medium supplemented with 100 mM NaCl during 3 d and chlorophyll was extracted as described in detail previously [18]. The chlorophyll content was measured spectrophotometrically at 652 nm (UltraspecTM 1100) [34].

### In situ ROS detection

Seedlings were incubated with 10  $\mu$ M of the cell permeable fluorescent probe 2',7'-dichloro-dihydro fluorescein (H2DCF DA, Sigma-Aldrich) in 5 mM MES Buffer pH 5.7, 250  $\mu$ M ClK and 1 mM  $\text{Cl}_2\text{Ca}$  during 30 min in darkness. After three washes, seedlings were examined by epi-fluorescence in an Eclipse E200 microscope (Nikon, <http://www.nikon.com/>) connected with a high-resolution digital camera (Nikon). Fluorescence intensity in LR was quantified using ImageJ as image-analysis software (<http://rsbweb.nih.gov/ij/>).

H2DCF DA is de-esterified intracellularly and turns to highly fluorescent 2',7'-dichlorofluorescein upon oxidation.

### Superoxide Detection

To assay superoxide anion ( $\text{O}_2^-$ ) leaves from 14 dpg WT and *miR393ab* seedlings were stained with 0.2% (w/v) NBT in 10 mM potassium phosphate buffer pH 7.5 for 30 min as described by Jabs et al. [35]. Leaves were bleached in 96% (v/v) ethanol overnight.

### ROS Measurements

Seven dpg seedlings were transferred into liquid ATS medium supplemented with 100 mM NaCl for 12 h and  $\text{H}_2\text{O}_2$  was extracted as described in detail previously [18]. Endogenous  $\text{H}_2\text{O}_2$  was quantified based on the reaction of xylenol orange (*o*-cresolsulfonephthalein 3',3"-bis (methylimino) diacetic acid sodium salt with the peroxide-mediated oxidation of  $\text{Fe}^{2+}$  to  $\text{Fe}^{3+}$  [36].

### APX and CAT Activity

Seven dpg seedlings were transferred to liquid ATS medium supplemented with 100 mM NaCl for 12 h. Catalase (CAT) and ascorbate peroxidase (APX) activities were measured as described in detail previously [18]. Total proteins were measured according to Bradford [37] by using bovine serum albumin as standard.

### Ascorbate and GSH measurements

Seedlings (0.5–1 g) were ground in liquid  $\text{N}_2$  and the powder was extracted in 6% trifluoroacetic acid (TFA) followed by centrifugation at 13,000 g for 5 min. AA level was measured by high performance liquid chromatography (HPLC) as described in detail previously [38].

GSH was measured in the same homogenates used for AA determinations. Total thiols were assayed spectrophotometrically in a reaction mixture containing 100 mM  $\text{K}_2\text{HPO}_4$  buffer pH 7.5, 5 mM EDTA, 0.5 U  $\text{mL}^{-1}$  glutathione reductase, 0.5 mM 5,5'-dithiobis-(2-nitrobenzoic acid), 0.1 mM NADPH and different sample volumes [39]. GSSG was determined after treating samples with 2-vinylpyridine.

### Statistical Analysis

The values shown in figures are mean values  $\pm$  SE of at least 3 experiments. Approximately, 50 seedlings were processed per line in each experiment. The data were subjected to analysis of *t*-test or variance (one and two- ways ANOVA) and post hoc comparisons were performed with Tukey's multiple range test at  $P < 0.05$  level. SigmaStat 3.1(SPSS) was used as statistical software program.

## Results

### Auxin-dependent Physiological Responses in Whole Seedlings are Affected by Salinity

The induction of LR represents a very rapid, sensitive and quantitative parameter to evaluate an auxin-mediated response [40]. To explore the regulation of auxin-dependent physiological responses by salt, four dpg seedlings were transferred from auxin-free medium onto media containing IAA or the synthetic auxin 2,4-D in combination with increasing concentrations of NaCl (50, 75 and 100 mM). After 3 d, LR were quantified. As shown in Figure 1A and Figure S1, NaCl inhibited auxin-mediated induction of LR in a dose-response manner suggesting that salinity treatment counteracts auxin-dependent growth responses in Arabidopsis plants. This conclusion was also confirmed by exploring the effect of salinity on the inducibility of the auxin signaling reporters *BA3pro:GUS* and *DR5pro:GUS* seedlings. To induce auxin response, 7 dpg seedlings were transferred to liquid ATS medium containing 50 nM or 100 nM IAA in combination with increasing concentrations of NaCl (100 and 200 mM) for 4 h. IAA treatments stimulated *GUS* expression in a dose-dependent manner as indicated by a bright-blue colour in root tips of *BA3pro:GUS* seedlings, NaCl had a clear inhibitory effect in auxin-mediated *GUS* expression (Figure 1B). In 100 nM IAA-treated *BA3pro:GUS* seedlings, *GUS* mRNA level was quantified under increasing concentrations of NaCl. Approximately, a 75% repression in auxin response was estimated through *GUS* mRNA level quantification in 200 mM NaCl-treated seedlings compared with control (Figure 1C). In agreement with this result, NaCl treatment blocked *GUS* expression in whole *DR5pro:GUS* seedlings including cotyledons, shoots, root tips, and LR (Figure 1D). These results showed a correlation between the formation of less LR (Figure 1A) and the reduction of auxin-dependent promoter inducibility in LR by NaCl.

### Salinity Represses TIR1/AFB2-Mediated Auxin Signaling

NaCl might inhibit auxin response by modulation of auxin signaling. Auxin-mediated gene expression is regulated via TAARs. Thus, NaCl action may result in transcriptional repression of *TAAR* genes. To test this possibility, the effect of NaCl-mediated salinity was analysed in *TIR1pro:TIR1-GUS* and *AFB2pro:AFB2-GUS* seedlings. In both transgenic lines, *GUS* enzyme is fused to the C-terminal region of the TIR1 or AFB2 protein and expressed under the control of their respective natural promoters. Firstly, we explored TIR1 level in *TIR1pro:TIR1-GUS* seedlings after NaCl treatment in a time-course assay. Four hours of NaCl treatment was sufficient to down regulate TIR1 level (Figure S2C). Then, 7 dpg *TIR1pro:TIR1-GUS* and *AFB2pro:AFB2-GUS* seedlings were subjected to increasing concentrations of NaCl (50 mM, 100 mM and 200 mM) for 4 h. As shown in Figure 2, A and B, NaCl reduced *GUS* staining in both lines suggesting a reduction in TIR1 and AFB2 protein levels by salt. *AFB2pro:AFB2-GUS* line showed a dose-dependent inhibition of AFB2 content while NaCl at 50 mM was sufficient to reduce and restrict *GUS* staining to the root tip in *TIR1pro:TIR1-GUS* line. In agreement, Arabidopsis plants expressing a cMyc

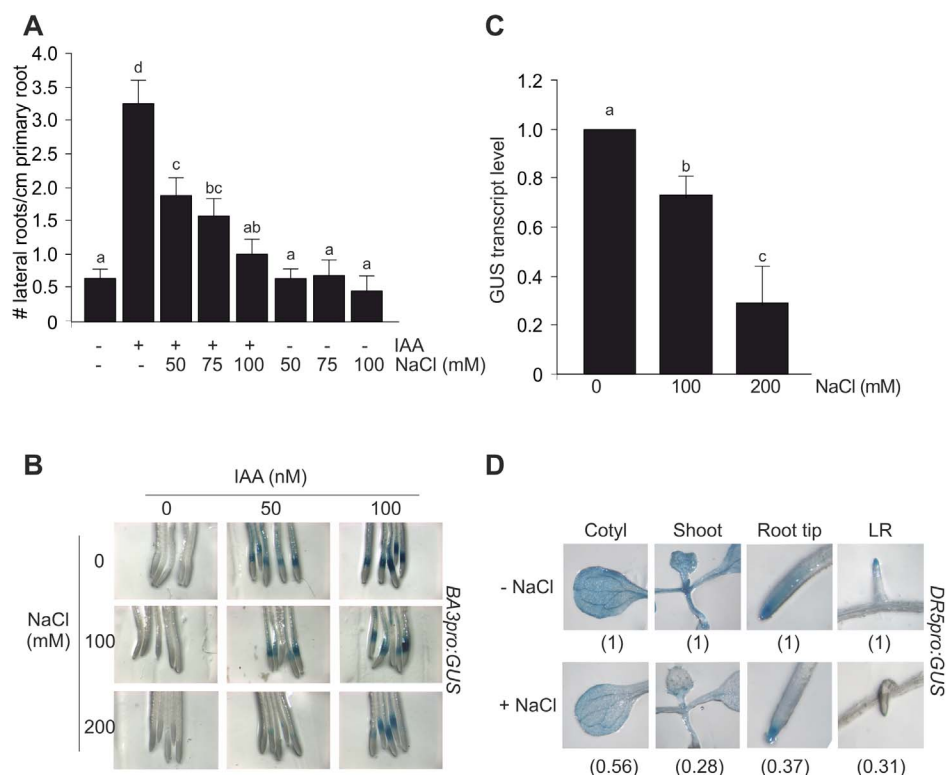

**Figure 1. Auxin responses are affected by salinity in Arabidopsis seedlings.** (A) Four dpg WT seedlings were transferred from auxin-free medium onto ATS medium containing no auxin or 85 nM IAA in combination with increasing concentrations of NaCl. The total number of emerged lateral roots was counted 4 d after the transfer to new media. Data are mean values ( $\pm$ SE) of three independent experiments. Different letters indicate a significant difference at  $P \leq 0.05$  (Tukey test). (B) Seven dpg *BA3pro:GUS* seedlings were incubated on 50 nM or 100 nM IAA in combination with increasing concentrations of NaCl for 4 h. GUS activity was revealed after incubation with X-Gluc at 37°C. GUS staining in representative root tip segment is shown. (C) Relative transcript level of GUS upon 100 nM IAA treatment in combination with NaCl as described in (B). The control value is arbitrarily set to 1 in each case. Data are mean values ( $\pm$ SE) of three independent experiments. Different letters indicate a significant difference at  $P \leq 0.05$  (Tukey test). (D) Seven dpg *DR5pro:GUS* seedlings were incubated with 200 mM NaCl for 4 h and subjected to GUS staining. Images show different parts of seedlings: cotyledons (Cotyl), shoots, root tip and LR. The GUS signal detected in NaCl treatment relative to control is shown. The control value is arbitrarily set to 1 in each case. Data are mean values of three independent experiments. doi:10.1371/journal.pone.0107678.g001

epitope-tagged TIR1 under the *CaMV 35S* promoter showed a reduction of approximately 30% of TIR1 protein level in whole seedling after 4 h of 200 mM NaCl treatment (Figure 2, C and D).

In the presence of auxin, TAARs interact with Aux/IAA proteins to promote their degradation. Thus, a reduction in TIR1 and AFB2 levels should lead to less Aux/IAs degradation. To test whether salt stress leads to stabilization of Aux/IAA proteins, we analyzed the expression of the reporter protein AXR3NT-GUS under salt treatment. The *HSpro:AXR3NT-GUS* reporter encodes a fusion between the amino terminus of the Aux/IAA repressor AXR3/IAA17 and GUS driven by a heat-shock (HS)-inducible promoter [4]. After heat shock treatment, 7 dpg seedlings were treated with IAA in combination with NaCl for 4 h and then assessed for GUS expression. As expected, IAA treatments caused a decrease in AXR3NT-GUS stability but this was substantially counteracted by 100 and 200 mM NaCl since seedlings exposed to salinity exhibited stronger GUS staining (Figure 2E, lower panel). The increased AXR3NT-GUS stability was also detected in NaCl-treated seedlings in the absence of IAA (Figure 2E, upper panel) suggesting that down-regulation of TIR1 and AFB2 by salinity is concomitant with the stabilization of Aux/IAA repressors in Arabidopsis leaves.

### Down-regulation of the TIR1 and AFB2 Receptors by miR393

TIR1-mediated auxin signaling is post-transcriptionally regulated by miR393 and *siTAARs* in Arabidopsis seedlings grown in standard conditions [9,11,15]. Additionally, miR393 also plays important roles during responses to various stress conditions [12,13,14,41]. We hypothesized that miRNA-mediated regulation of TAARs could take part during Arabidopsis adaptive response to salinity. ARGONAUTE (AGO) proteins are essential components in the RNA silencing pathways that mediate mRNA degradation or translation inhibition through the binding of small RNAs at their target sites [42]. We analysed the expression of *TIR1* in 7 dpg WT and *ago1-27* seedlings subjected to 200 mM NaCl treatment for 4 h. Whereas NaCl-mediated salinity triggered a 25% reduction of TIR1 transcript level in WT plants, *ago1-27* did not show changes after 4 h of initial treatment suggesting miRNA-mediated regulation of *TIR1* (Figure 3A). Similarly, *AFB2* also showed down-regulation by salt (Figure S3). To determine whether miR393 plays a role in TAAR regulation during salinity, TIR1 level during salinity was evaluated in *TIR1pro:mTIR1-GUS* seedlings. This line includes four silent nucleotide changes within the miR393 recognition site predicted to make the transgene resistant to miR393-directed regulation. Coherently with miR393 regulation, mTIR1 did not show changes after salt treatment in

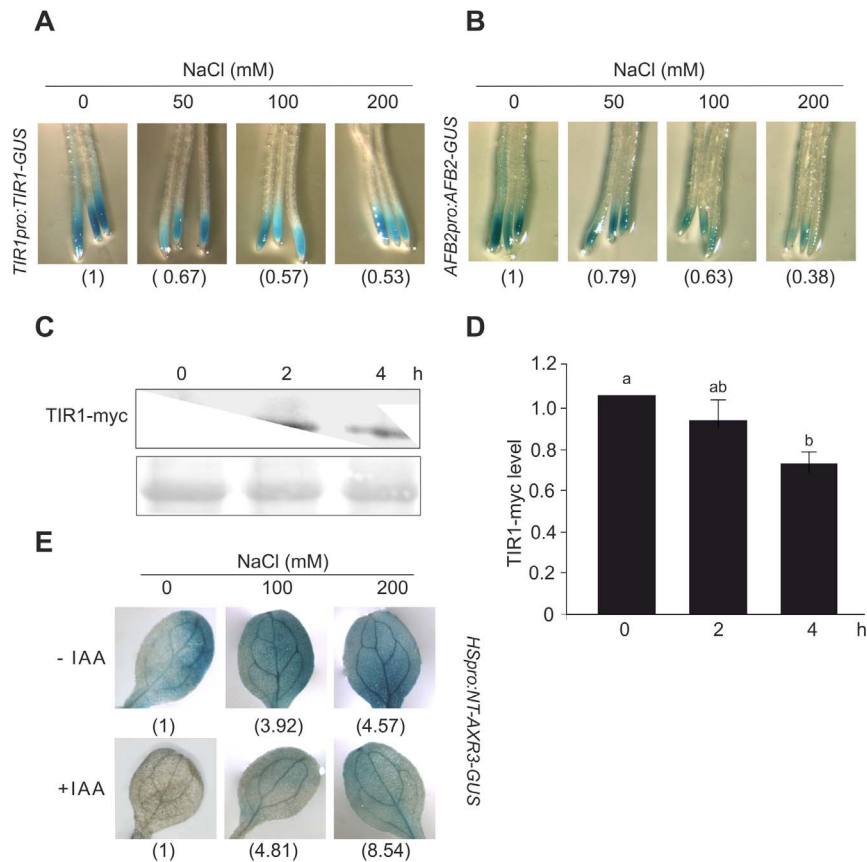

**Figure 2. Salinity represses auxin signaling pathway.** Seven dpg *TIR1pro:TIR1-GUS* (A) and *AFB2pro:AFB2-GUS* (B) seedlings were incubated in liquid ATS medium with increasing concentrations of NaCl for 4 h and then subjected to GUS staining. Representative photographs of root tips are shown. The control value is arbitrarily set to 1 in each case. Data are mean values of three independent experiments. (C) Seven dpg *tir1-1 355::TIR1-Myc* plants were transferred to liquid ATS medium supplemented with 200 mM NaCl for different times. Total proteins were extracted and protein blot analysis was carried out using an anti cMyc antibody (upper panel). Ponceau staining of Rubisco is shown (bottom panel). (D) Densitometric analysis of three independent immunoblots as indicated in (C). Data are mean values ( $\pm$ SE). Different letters indicate a significant difference at  $P \leq 0.05$  (Tukey test). (E) Seven dpg *HSPpro:NT-AXR3-GUS* seedlings were transferred for 2 h to 37°C and then incubated with 100 and 200 mM NaCl in the absence (upper panel) or presence (lower panel) of IAA. GUS activity was revealed after incubation with X-Gluc at 37°C. Representative photographs and the GUS signal detected in NaCl treatment relative to control is shown. The control value is arbitrarily set to 1 in each case. Data are mean values of three independent experiments. doi:10.1371/journal.pone.0107678.g002

this transgenic seedling (Figure 3B). In particular, the Arabidopsis genome contains two miR393 precursors on chromosomes 2 (*AtMIR393A*) and 3 (*AtMIR393B*), both producing identical mature miR393 [43,44]. In *MIR393pro:GUS* fusion lines, 2.5 kb upstream of each gene (*AtMIR393A* and *AtMIR393B*) is used to drive expression of the *GUS* reporter. Thus, these lines were used to visualize miR393 expression in specific tissues and determine the potential contribution of each miR393 precursor under salinity. Seven dpg *MIR393A::GUS* and *MIR393B::GUS* seedlings were treated with 200 mM NaCl for 0, 2, 4 and 6 h and then stained for GUS activity. The activation of *MIR393A* promoter was observed after 2 h of initial treatment (Figure S2A). Up-regulation of miR393 levels dependent on salt concentration was detected in shoots as well as in roots when *MIR393Apro:GUS* seedlings were subjected to increasing concentrations of NaCl for 2 h (Figure 3C). In addition, *MIR393Apro:GUS* salt-treated roots showed increase GUS intensity in the central stele of LRs including the pericycle layer (Figure 3D and Figure S4). An increase of approximately 50% of GUS mRNA level was observed in 200 mM NaCl-treated *MIR393Apro:GUS* transgenic seedlings respect to control condition (Figure 3E) which was consistent with

GUS staining data (Figure 3C). However, *MIR393B* promoter was just slightly activated and GUS mRNA level was unaltered in 200 mM NaCl-treated *MIR393Bpro:GUS* seedlings suggesting that *MIR393A* is the promoter mainly induced during salinity (Figure S2B; Figures S5, A and B). The inability of *mir393ab* mutants to reduce TIR1 transcript level and to stabilize Aux/IAA repressors in NaCl-treated seedlings reinforced the role of miR393 as a regulator of TAAR during salinity (Figure 3A, Figure S6). Furthermore, quantification of miR393 by Northern blot assay indicated that miR393 level is induced 20% in roots of NaCl-treated seedlings after 4 h of treatment (Figure S7).

#### Auxin-Dependent Morphological Responses are Affected by Salinity in *mir393* Mutants

The induction of miR393 during salinity with the concomitant reduction in TIR1 and AFB2 levels prompted us to determine whether miR393-mediated down-regulation of auxin signaling is involved in morphological changes that take place in seedlings growing under salt stress. Since salt treatment over 100 mM NaCl is a very strong stress that severely affects root growth, we set up a 75 mM NaCl concentration for all physiological experiments.

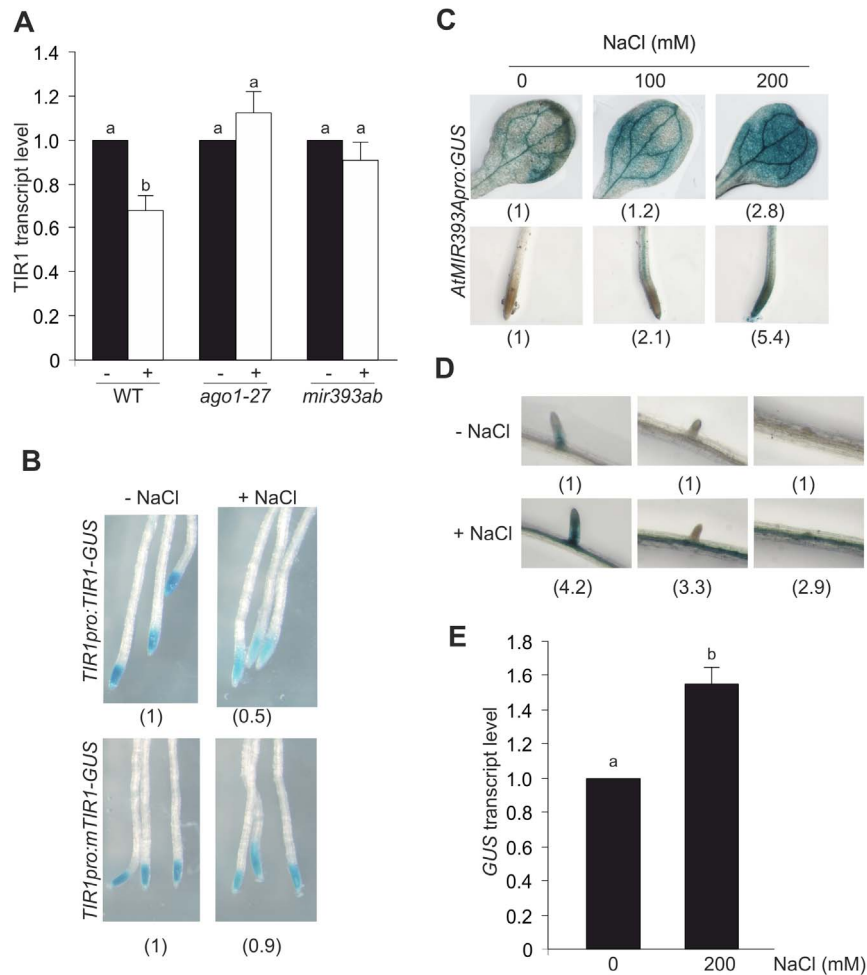

**Figure 3. Salt-mediated down-regulation of *TIR1* by miRNAs.** (A) Seven dpg WT, *ago1-27* and *mir393ab* seedlings were subjected to 200 mM NaCl treatment for 4 h. Relative transcript level of *TIR1* upon treatment was measured by RT-PCR. The control value is arbitrarily set to 1 in each case. Data are mean values ( $\pm$ SE) of three independent experiments. Different letters indicate a significant difference at  $P \leq 0.05$  (Tukey test). (B) Seven dpg *TIR1pro:TIR1-GUS* and *TIR1pro:mTIR1-GUS* seedlings were incubated in liquid ATS medium with NaCl for 4 h and then subjected to GUS staining. Representative photographs of root tips are shown. The control value is arbitrarily set to 1 in each case. Data are mean values of three independent experiments. (C,D) Seven dpg *AtMIR393Apro:GUS* seedlings were transferred to liquid ATS medium supplemented with increasing concentrations of NaCl for 2 h. GUS activity was revealed after incubation with X-Gluc at 37°C. GUS staining in representative leaves and root segments are shown. The control value is arbitrarily set to 1 in each case. Data are mean values of three independent experiments. (E) Relative transcript level of GUS in NaCl-treated *AtMIR393Apro:GUS* seedlings was quantified upon treatment. The control value is arbitrarily set to 1 in each case. Data are mean values ( $\pm$ SE) of three independent experiments. Different letters indicate a significant difference at  $P \leq 0.05$  (Tukey test). doi:10.1371/journal.pone.0107678.g003

Four dpg seedlings were transferred to medium containing NaCl and emerged LR were counted for several days. A reduction in the number of LR was observed in NaCl-treated seedlings of *mir393ab* mutant and WT after 5 d of treatment. However, *mir393ab* seedlings exhibited a lower reduction in the number of LR (28% at 75 mM NaCl) under salinity compared to WT (60%) (Figure 4, A and B). In contrast, *tir1afb2* showed an intrinsic reduction in the LR number that was almost not affected by salt (Figure S8A and B).

Evidence from genetic and physiological studies suggest that auxin is required at different specific developmental stages to mediate LR formation, since it drives primordium formation, LR initiation, emergence and elongation [45]. In order to understand the regulatory mechanism affected in *mir393ab* mutant, root architecture was examined in more detail according to Duan et al. [46]. When 4 dpg seedlings are transferred to 75 mM NaCl treatment for additional days, two regions are established along

the PR: region A (for above transfer point), where LR patterning is expected to have occurred before treatment of roots with high salinity, and region B (for below transfer point), where LR patterning occurs under the effect of NaCl. Then, we quantified the number of emergent and mature LR in both regions under control and salinity treatment according to Malamy and Benfey [31]. *mir393ab* plants showed no differences in the number of emergent LR in region A while it presented a slight increase in the number of mature LR in NaCl treatment (Figure 4C). However the higher number of LRs previously observed in *mir393ab* mutant (Figure 4B) agrees with the 2-fold higher number of emergent LRs in region B compared with WT (Figure 4D). Further studies to determine whether miR393 is involved in the increase of branch points specified along the PR or in the enhanced initiation and emergence rate will be the subject of another study and for this reason is not discussed further here. Finally, measurement of post-emergence LR length revealed that

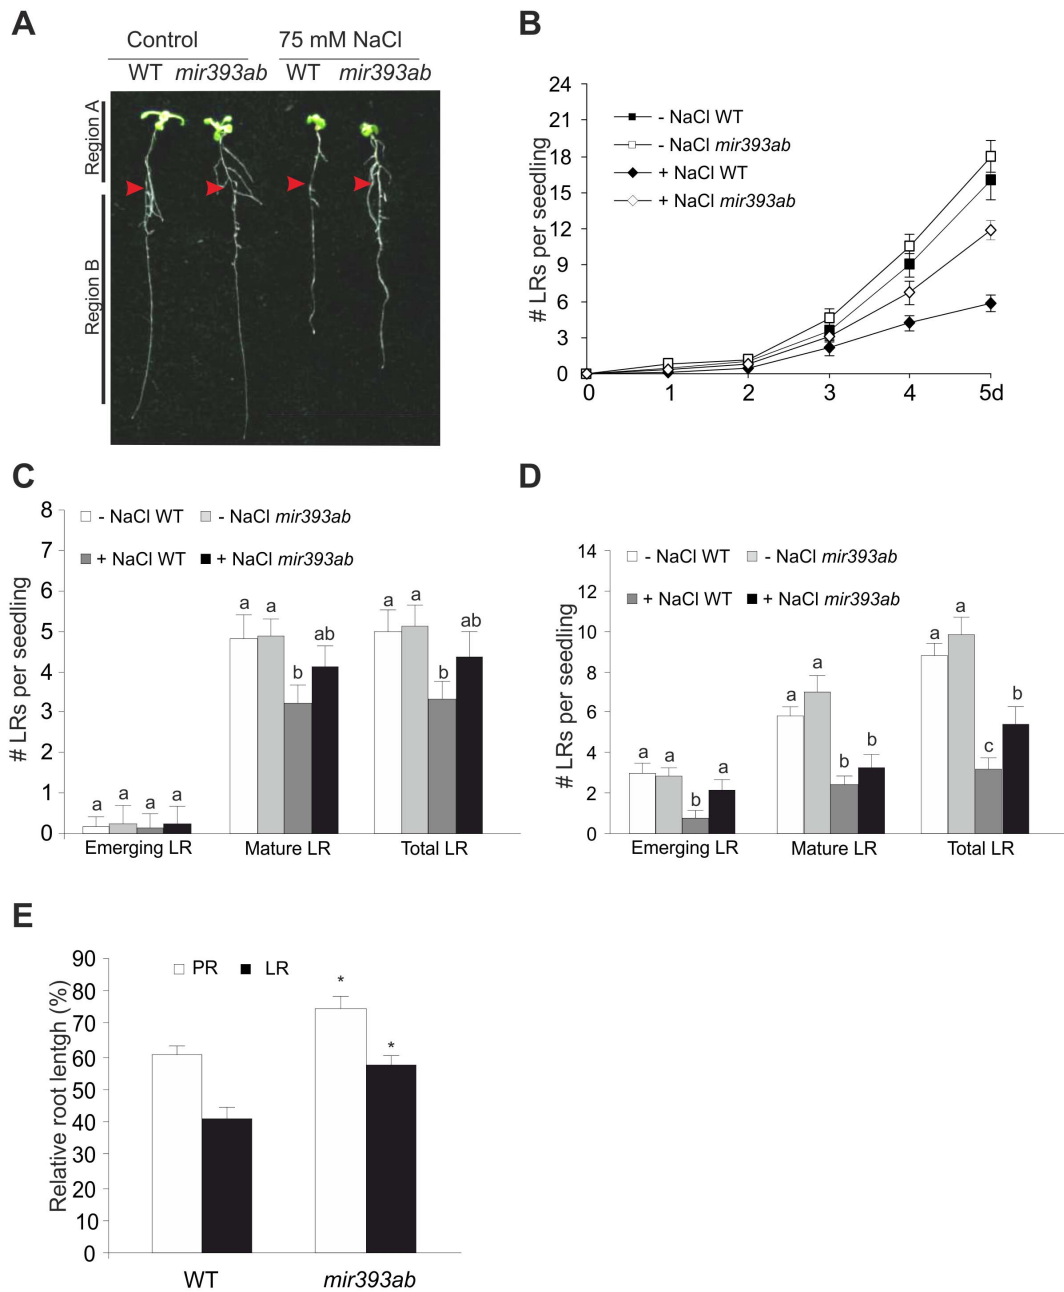

**Figure 4. NaCl influences auxin-dependent morphological responses through miR393 regulation.** Four-dpg WT and *mir393ab* seedlings were transferred onto ATS medium containing 75 mM NaCl. Arrowheads mark the position of the root tip at the time of transfer from standard to treatment conditions. Representative photographs of seedlings after 5 d of treatment are shown in (A) LR were quantified at designed times (B) Data are mean values ( $\pm$ SE) of three independent experiments. (C) and (D) Quantification of emergent and mature LR in root region A and region B after transfer to standard or salt stress conditions, respectively. Data are mean values ( $\pm$ SE) of three independent experiments. Different letters indicate a significant difference at  $P \leq 0.05$  (Tukey test). (E) Suppression of LR and PR growth under 75 mM NaCl conditions measured as a percentage of growth relative to standard conditions. Seedlings were transferred to salt at 4 dpg and grown for 5 d post treatment. Data are mean values ( $\pm$ SE) of three independent experiments. Asterisks mark significant changes between WT and *mir393ab* at  $P \leq 0.05$  ( $t$ -test). PR: WT -NaCl 7.35 cm $\pm$ 0.55; WT +NaCl 4.34 cm $\pm$ 0.39; *mir393ab* -NaCl 7.41 cm $\pm$ 0.29; *mir393ab* +NaCl 5.5 cm $\pm$ 0.17. LR: WT -NaCl 0.95 cm $\pm$ 0.15; WT +NaCl 0.39 cm $\pm$ 0.12; *mir393ab* -NaCl 0.96 cm $\pm$ 0.14; *mir393ab* +NaCl 0.57 cm $\pm$ 0.08... doi:10.1371/journal.pone.0107678.g004

miR393 could be also involved in repression of LR elongation during salinity since *mir393ab* mutant showed a reduced inhibition (18%) of LR length in NaCl-treated seedlings compared to WT (Figure 4E). PR inhibition during salinity was also measured and although it was of less magnitude compared with the effect previously observed in LRs, again *mir393ab* mutant

showed a reduced inhibition compared to WT seedlings (15%; Figure 4E). In contrast, *tir1afb2* showed enhanced inhibition of PR growth by salt treatment (Figure S8C).

In addition, a smaller rosette size was observed when WT seedlings grow in 75 mM NaCl- treatment. However, while WT

seedlings showed a reduction of 33% in the rosette area, *mir393ab* seedlings evidenced lower inhibition (Figure S9).

### miR393 Regulation of Auxin Signaling Triggers Changes in Redox Related Components

According to previous findings, an interlink between auxin and ROS was proposed to regulate growth and plant defense in responses to stress [17]. However, the precise mechanism remains to be elucidated. Hence, we focused on understanding how miR393-mediated repression of TIR1 influences ROS accumulation and antioxidant components during salinity. First, we analyzed endogenous ROS levels *in situ* in LR of *mir393ab* and WT seedlings after 5 d of 75 mM NaCl treatment by using H<sub>2</sub>DCF DA probe. *mir393ab* seedlings showed 2-fold higher level of ROS in LR under 75 mM NaCl (Figure 5). However, in WT plants, where auxin signaling is down-regulated, inhibition of LR development was associated to a concomitant reduction of ROS levels.

In a previous work, we reported that *tir1afb2* mutant with reduced auxin response exhibits reduced levels of ROS under salinity compared to WT seedlings [18]. We then hypothesized that repression of auxin signaling through miR393 action could reduce the ROS burst that is generated by salt stress with detrimental effects on cellular processes. To further explore miR393 action on auxin regulation of ROS homeostasis, H<sub>2</sub>O<sub>2</sub> was measured in seedlings treated with 100 mM NaCl for 12 h when an induction of H<sub>2</sub>O<sub>2</sub> levels in WT plants was previously described [18,47]. However, compared with WT, *mir393ab* seedlings showed an increase of more than 50% in peroxide accumulation after salt treatment while a slight increase was observed under standard conditions (Figure 6A). O<sub>2</sub><sup>-</sup> content in leaves of NaCl-treated plants was also higher in *mir393ab* mutant

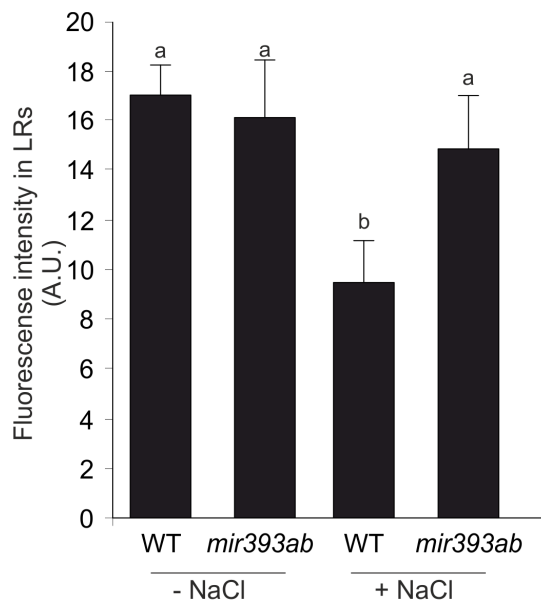

**Figure 5. ROS accumulation in LR of *mir393ab* seedlings during acclimation to salinity.** Four dpg WT and *mir393ab* seedlings were transferred onto ATS medium containing 75 mM NaCl. After 5 d of treatment, endogenous H<sub>2</sub>O<sub>2</sub> was detected *in situ* by H<sub>2</sub>DCF DA probe. Quantification of probe fluorescence intensity in LR is shown. LR were selected from the same position on the primary root. a.u., arbitrary units. Data are mean values ( $\pm$ SE) of three independent experiments. Different letters indicate a significant difference at  $P \leq 0.05$  (Tukey test). doi:10.1371/journal.pone.0107678.g005

compared with WT, as evidenced by *in situ* O<sub>2</sub><sup>-</sup> detection through NBT assay (Figure S10). In order to alleviate deleterious effects of ROS, plants employ defence systems that include non-enzymatic antioxidant compounds such as AA and glutathione and ROS scavenging enzymes. We hypothesized that the increased levels of ROS in *mir393ab* mutant plants under stress could be explained by a repression of the antioxidant metabolism. Consistent with this idea, a 56% reduction of APX enzymatic activity was observed in *mir393ab* compared with WT seedlings either in absence or presence of NaCl (Figure 6B). Catalase enzymatic activity was also measured but no difference was detected between *mir393ab* and WT seedlings (Figure 6C), probably indicating a specificity in the antioxidant enzyme regulation mediated by miR393 during salinity. Antioxidant metabolites, AA and GSH did not show significant changes between *mir393ab* and WT seedlings under either standard or salt-conditions (Table S1) while both of them were slightly reduced in *mir393ab* seedlings.

Finally, on the basis of the strong and rapid inhibitory effect of NaCl on auxin responses as well as the likely role of miR393 regulation on auxin signaling and ROS metabolism during salinity, we speculated that the repression of the auxin pathway is an important aspect of the defence response. Loss of chlorophyll is one of the most evident symptoms during oxidation by salt stress. Therefore, 7 dpg seedlings were transferred from solid ATS medium to liquid ATS medium containing 100 mM NaCl and after 3 d of salt treatment, the chlorophyll level was quantified in mutants and WT seedlings. As shown in Figure 6D, *mir393ab* showed a clear reduction of chlorophyll content under salt treatment compared with WT plants, suggesting enhanced damage under salinity. Conversely, *tir1-1* conserves 30% more chlorophyll than the WT upon salinity. Overexpression of TIR1 protein in the *tir1-1* background rescued the WT sensitivity to NaCl.

### Discussion

High salt concentration in productive soil arrests the plant's ability to take up water and grow. Thus, understanding the strategies that plants evolved to cope with salinity is of agronomic importance. Our study reveals how Arabidopsis seedlings regulate the auxin signaling pathway in order to modulate auxin-mediated morphological responses during NaCl-mediated salinity. In this work, we demonstrate that salinity induces the expression of miR393, primarily by enhancing the expression of *MIR393A*. In turn, miR393 negatively regulates TIR1 and AFB2 mRNA to lead to the stabilization of Aux/IAA repressors and to concomitant repression of auxin signaling. In addition, we report how miR393-mediated auxin down-regulation can influence root architecture during acclimation to salinity.

Depending on the type, intensity and duration of environmental stimuli as well as the plant developmental stage, auxin regulation could be controlled at different levels. For example, changes in auxin homeostasis and redistribution have been reported for plants growing under osmotic or mild salt stresses [2,48,49,50]. When other ways by which NaCl might inhibit auxin response to salinity were explored, no difference in the concentration of free IAA was detected in WT seedlings under salt treatment (data not shown). Although we cannot rule out that auxin biosynthesis or transport could be also affected by NaCl at specific tissues or times, we assert that auxin signaling would be a dominant level of auxin regulation for acclimation during salinity. Since TIR1 and AFB2 are down-regulated during salt stress, we suggest that these two auxin receptors could be functionally required. However, while AFB2 showed a dose response to NaCl from 50 to 200 mM NaCl, TIR1



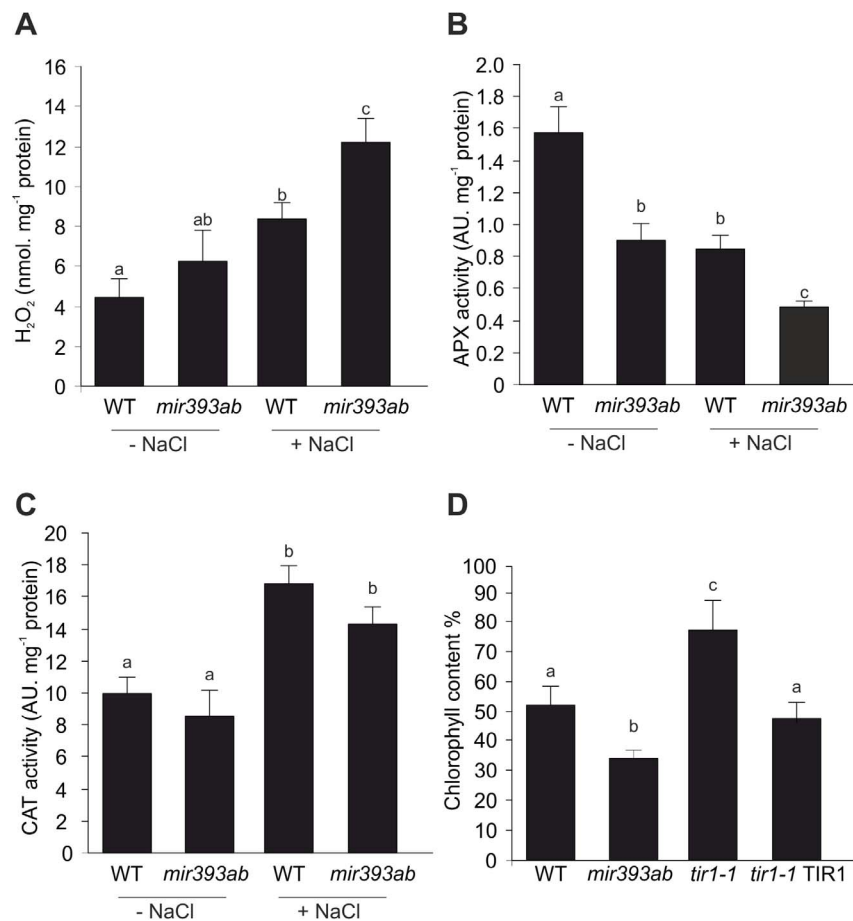

**Figure 6. miR393 early regulates redox components under salt.** Seven dpg WT and *mir393ab* seedlings were transferred onto liquid ATS medium supplemented with 100 mM NaCl. After 12 h of initial treatment (A)  $H_2O_2$  accumulation, (B) APX activity and (C) CAT activity were measured. (D) Seven dpg *mir393ab*, *tir1-1*, *tir1-1 35Spro:TIR-Myc* and WT seedlings were treated with 100 mM NaCl for 3 d. Chlorophyll content was measured and expressed as percentage of untreated seedlings. Data are mean values ( $\pm$ SE) of three independent experiments. Different letters indicate a significant difference at  $P \leq 0.05$  (Tukey test). doi:10.1371/journal.pone.0107678.g006

showed a similar repression from 50 mM NaCl to higher concentrations. TIR1 and AFB2 have been described as the dominant auxin receptors during seedling root growth, and biochemical differences between members of the auxin receptor family were detected and associated with the complexity of auxin response [9].

In order to get insights into the mode by which auxin signaling is repressed during acclimation to stress, the posttranscriptional regulation of auxin receptors by miR393 was further investigated. Previously, it has been reported that the locus-specific control of miR393 transcription can provide an additional layer of regulation for the auxin-signaling network through repressing target gene expression [15]. For instance, repression of auxin signaling through *AtMIR393A* action has been described in biotic stress response to *Pseudomonas* in Arabidopsis [13]. In addition, *AtMIR393B* has been reported to be the most important miR393 precursor involved in auxin-related development of leaves [11,15]. In this current work, we showed that the promoter of *AtMIR393A* is activated by salt in whole seedlings, including shoots, principal root and LR. GUS induction in *MIR393Apro:GUS* lines during salt stress correlated with the repression of GUS activity in the *TIR1pro:TIR1-GUS* and *AFB2pro:AFB2-GUS* lines. These complementary patterns of *MIR393pro:GUS* and

TIR1/AFB2 expression have been demonstrated during normal development of roots [9].

Salt treatment was unable to induce AXR3-GUS stability and to repress auxin response when *HSpro:AXR3-GUS* and *DR5pro:GUS* were analyzed in the *mir393ab* background (Figure S6). In addition to these facts, TIR1 level was not affected by salt in *mir393ab* seedlings and salt treatment did not reduce GUS staining in the resistant *TIR1pro:mTIR-GUS* line. Based on these observations, we propose that miR393-mediated posttranscriptional regulation of auxin receptors might be a crucial component of plant acclimation to salinity. Single mutant, *mir393a* and *mir393b* were not impaired in the down-regulation of TIR1 during salt stress (Figure S11A). We suspect that this is due to the fact that they are not null mutants, and therefore still accumulate sufficiently high levels of miR393 [26]. Such behavior of single mutants with a slight effect on *mir393a* mutant was also observed in biochemical and physiological responses including chlorophyll levels and LR number after salt exposition (Figure S11, B and C, respectively). Quantification of miR393 in roots by Northern blot assay indicated that miR393 is effectively induced (approximately 20%) in NaCl-treated seedlings (Figure S7). Importantly, although an induction was also detected in *mir393ab* mutant during salinity its level was more than 50% lower than in WT plants. We detected a slight reduction of miR393 levels after 1 h of salt treatment.

However, we do not know whether this decrease has a biological significance for response to salt stress or whether this could suggest that other unidentified mechanisms contribute to the complex homeostasis of TIR1 and AFB2 regulation during acclimation to salinity.

Plants exposed to mild abiotic stress conditions exhibit different kind of stress-induced morphogenic responses (SIMR). SIMR has been postulated as part of a plant general acclimation strategy, whereby growth is reprogrammed to reduce exposure to stress [51,52]. Frequently, observed symptoms in plant adaptive responses to salinity include growth retardation. In this direction, high salinity was reported to inhibit PR and LR growth [53,54]. However, the adjustment of root growth to salinity seems to be less clear compared with other abiotic stresses [55]. Here, we explored the function of miR393-mediated modulation of auxin signaling in regulating root growth to reveal one putative mechanism by which salt could control root system architecture. Given the importance of root architecture during stress and the fact that, each organ might have different response programs during acclimation to stress we focused on the analysis of LR. Consistent with this fact, WT and *mir393ab* showed a reduction in the LR number during salinity but the amplitude of this reduction was much lower in *mir393ab* seedlings, suggesting an inability of this mutant to redirect root growth and development under salinity. Genetic and physiological evidence suggests that auxin is required at several specific developmental stages to facilitate LR formation [45]. A more precise analysis of the pattern of LR development in the *mir393ab* mutant suggested that miR393 mediates the inhibition of LR initiation and elongation when plants grow under salinity. Previous studies have postulated that changes in auxin levels by treatment with the auxin-transport inhibitor naphthylphthalamic acid (NPA) decreased the number and density of LR in *A. thaliana* plants [56].

Parry et al. [9] reported the expression of miR393 along the central stele in the primary root and later stages of LR development. Nevertheless, when seedlings were exposed to 200 mM NaCl for 2 h an activation of *MIR393A* promoter was detected in emergent and mature LR. Cross-sectional analysis of *MIR393Apro::GUS* roots showed that salinity induces *MIR393A* promoter activity in pericycle cells, which are stimulated to differentiate and proliferate to form primordia RL [31]. It was demonstrated that the local auxin accumulation in root pericycle cells is a specific and sufficient signal to specify pericycle cells into LRs founder cells [57]. Therefore, induction of miR393 in the pericycle cells with the consequent suppression of auxin signaling mediated by TIR1/AFBs could be an effective mechanism for cell-specific regulation of LR organogenesis during salt stress. Recently, it was demonstrated that endodermis is a tissue-specific cell layer where abscisic acid (ABA) signaling acts to regulate LR growth under salt-stress conditions [46]. According to Geng et al. [58] and to our results, a dynamic regulation of multiple hormonal signaling pathways involving auxin, ABA, gibberellic acid (GA), jasmonic acid and brassinosteroids should be necessary for temporal regulation of root patterning during acclimation to salinity.

In addition, *mir393ab* mutant failed in NaCl-mediated inhibition of PR elongation and rosette growth suggesting that miR393 is involved in different SIMR during salinity (Figure 4E and Figure S9).

Our findings are also consistent with results obtained in other systems where miR393 overexpression by stress has been reported. For instance, the overexpression of Arabidopsis *AtMIR393A* gene in tobacco modified auxin response and enhanced tolerance to salt stress [59]. Even more, miR393 up-regulation has been also

described for other abiotic stresses such as cold, dehydration, and metal toxicity [41,60,61] but so far, the role of miR393 in these responses has not been explored.

Again in relation to SIMR, ROS and auxin signaling have been pointed out as important players in the regulatory networks that operate during adaptation to stress [17]. The mechanisms underlying the crosstalk between auxin and ROS and its impact on growth regulation remains to be elucidated. It is known that under various adverse environmental conditions, ROS homeostasis can lead to oxidative damage and cell death [62]. However, a multifaceted network of ROS producing and ROS-scavenging enzymes define a key homeostasis, from which ROS are capable to act as signals in different cellular processes [63]. Hence, ROS can result in potent signaling molecules that adjust growth, development and plant defense mechanism to stress [64]. In addition, an interaction between auxin and ROS signaling has been suggested during salinity by using *tir1 afb2* mutant [18]. Compared with WT, *tir1 afb2* plants showed significantly reduced ROS accumulation, higher antioxidant enzymatic activities as well as increased levels of AA revealing that down-regulation of auxin signaling impacts ROS metabolism under salinity. In order to provide new insights into the mechanism by which auxin and ROS could be regulated in plants growing under salt stress conditions, *mir393ab* seedlings were analyzed. Coinciding with the altered root architecture, an enhanced endogenous accumulation of ROS was showed in LR of *mir393ab* seedlings after 5 d of NaCl treatment. In WT plants, where auxin signaling is down-regulated by salinity, we detected an inhibition of LR development with a concomitant reduction of ROS levels. It has been recently described that auxin-mediated LR formation involved H<sub>2</sub>O<sub>2</sub> generation [65]. Furthermore, exogenous H<sub>2</sub>O<sub>2</sub> treatments mimics LR induction mediated by auxin [66] and H<sub>2</sub>O<sub>2</sub> is also required for auxin-induced adventitious root formation in mung bean [67,68]. Auxin also induces ROS production in maize developmental processes such as cell elongation of hypocotyls and the phenomenon of gravitropism [69,70,71]. Recent evidence proposed that auxin induces ROS production through the modulation of the NAD(P)H oxidase RbohD activity [72]. In this work, we found that *mir393ab* failed to counteract ROS accumulation evidenced by higher levels of ROS in roots as well as a reduction of APX enzymatic activity after 12 h of NaCl treatment, suggesting that auxin signaling could induce ROS through repression of the antioxidant system. Auxin negatively regulates the expression of *APX1* and *Zat12* transcription factor, which in turn regulates the expression of *APX1* [18]. In addition, Correa-Aragunde et al. [73] demonstrated that APX1 activity is inhibited by auxin-mediated denitrosylation. The current findings that the *mir393*-deficient mutant exhibits changes in APX but not in other antioxidant compounds such as AA and GSH, allowed us to suggest that specific components of redox control are subject to miR393-mediated auxin signaling regulation.

The plant antioxidant system consists of a number of enzymes and antioxidant compounds and this network was reported to be important for controlling excessive ROS production. However, the status of the antioxidant system is the result of changes in specific antioxidants depending on the type of stress, organ, tissue, cell and timing of the plant developmental program [63]. For instance, Barth et al. [74] reported that ascorbate deficient Arabidopsis mutant *vcl1-1* is effective in counteracting ROS during pathogen infection and suggested that the low intracellular level of ascorbate could be sufficient for ROS scavenging. APX activity represents a key component of the AA-GSH cycle involved in the major antioxidant system of plant cells contributing to cellular ROS homeostasis [75]. The disruption of APX activity

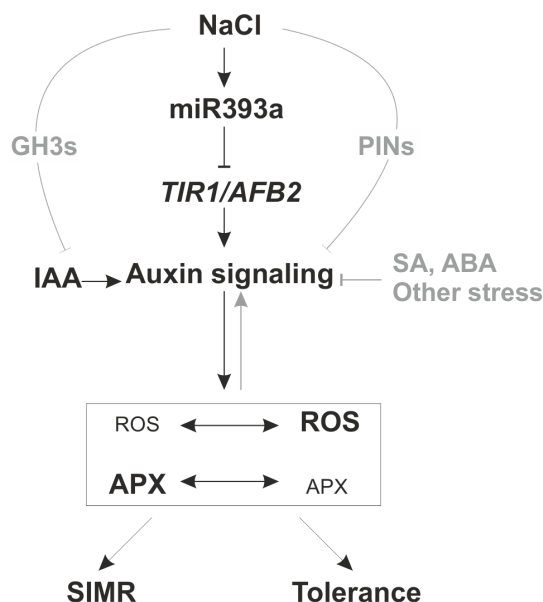

**Figure 7. Modulation of plant development and acclimation to salinity are interconnected responses influenced by miR393 regulation node.** These two processes are strongly regulated by reciprocal interaction between ROS and auxin signaling pathway. NaCl-mediated stress would conduct to miR393 induction that targets TIR1-AFB2 auxin receptors leading to stabilization of Aux/IAA repressors and down-regulation of auxin signaling pathway. In turn, auxin modulation influences on ROS-associated metabolism. Salt exposition leading to SIMR would be under negative regulation of the auxin signaling pathway. Depending on time and intensity of salt stress, early ROS-auxin crosstalk may exert impact on SIMR and tolerance to salinity. Others hormones and/or miRNAs may also regulate auxin-dependent pathway and physiological responses during acclimation to salinity. doi:10.1371/journal.pone.0107678.g007

(without changes in AA and GSH) might lead to increased steady state levels of oxidants in *mir393ab* cells affecting the root system. It was already reported that cytosolic APX1 knock-out plants present higher levels of H<sub>2</sub>O<sub>2</sub> and oxidative damage, showing growth retardation especially under stress conditions [76,77]. Recently, it was reported that PR elongation and LR formation is altered in response to auxin in the *apx1* mutant [73]. Their data indicate that auxin treatment induces H<sub>2</sub>O<sub>2</sub> accumulation in Arabidopsis roots through auxin-mediated partial denitrosylation of APX1. Furthermore, exogenous H<sub>2</sub>O<sub>2</sub> treatments results in inhibition of PR elongation and induction of LR formation, a phenotype reminiscent to the phenotype found in *mir393ab* seedlings and auxin-treated roots ([66]; this work). According to these, APX1 regulation exerted by miR393 may be a specific mechanism involved in the appropriate redistribution of H<sub>2</sub>O<sub>2</sub> accumulation during root growth and LR development in Arabidopsis.

Finally, a putative mechanistic model that may take place during SIMR in order to develop tolerance to salinity was described. An integrative miR393 post-transcriptional down-regulation of auxin signaling may be a regulatory module by which plants redirect plant growth and development through the modulation of ROS-associated metabolism in order to reallocate metabolic resources to defense responses and acclimation (Figure 7). Then, depending on the environmental stimuli a general acclimation strategy could help to compensate the stress-mediated redox imbalance and growth signals to control the reprogramming of plant development under stress. Lastly, it would

be interesting to determine the endogenous sources of ROS as well as the downstream consequences of ROS regulation in stressed tissues. In addition, Blomster et al. [22] reported that apoplastic ROS mediated by O<sub>3</sub> modified several aspects of auxin homeostasis and signaling. These authors also postulated that ROS could suppress the auxin pathway by decreasing TIR1/AFBs expression independently of miR393 and SA. In conclusion, future studies will be important to identify additional convergence points between ROS and auxin signaling and to explore specific methods to precisely quantify ROS to give deeper evidence on miR393-mediated regulation of ROS metabolism.

## Supporting Information

**Figure S1 Salinity effect on 2,4-D-mediated LR development.** Four dpg WT seedlings were transferred from auxin-free medium onto ATS medium containing no auxin or 85 nM 2,4-D in combination with increasing concentrations of NaCl. The total number of emerged lateral roots was counted 4 d after the transfer to new media. Data are mean values ( $\pm$ SE) of three independent experiments. Different letters indicate a significant difference at  $P \leq 0.05$  (Tukey test). (TIF)

**Figure S2 Salinity effect on *MIR393Apro::GUS*, *MIR393Bpro::GUS* and *TIR1pro::TIR1-GUS* seedlings.** Seven dpg (A) *MIR393Apro::GUS*, (B) *MIR393Bpro::GUS* and (C) *TIR1pro::TIR1-GUS* seedlings were transferred to liquid ATS medium supplemented with 200 mM NaCl for designated times. Representative photographs of root tips and the GUS signal detected in NaCl treatment relative to control is shown. The control value is arbitrarily set to 1 in each case. (TIF)

**Figure S3 AFB2 relative transcript levels in *ago1-27* and WT seedlings upon NaCl treatments.** Seven dpg WT and *ago1-27* seedlings were subjected to 200 mM NaCl treatment for 4 h. Relative transcript level of AFB2 upon treatment was measured by RT-PCR. The control value is arbitrarily set to 1 in each case. Data are mean values ( $\pm$ SE) of three independent experiments. Different letters indicate a significant difference at  $P \leq 0.05$  (Tukey test). (TIF)

**Figure S4 *MIR393A* promoter activity in cross sections of *MIR393A::GUS* roots upon NaCl.** Seven dpg *MIR393Apro::GUS* seedlings were transferred to liquid ATS medium supplemented with 200 mM NaCl for 2 h. Seedlings were included in a paraffin matrix (Paraplast) at 60°C and roots were cut into 5  $\mu$ m sections using a Minot type rotary microtome Zeiss HYRAX M 15. Section were deparaffined with xylene, mounted with Entellan and observed by bright field microscopy in an Olympus CX21 microscope. Images were captured using a digital camera attached to the microscope. e: endodermis; p: pericycle; Cb: Casparian band; x: xylem. The control value of GUS staining is arbitrarily set to 1. Data are mean values of 3 independent experiments ( $n = 6$ ). (TIF)

**Figure S5 *MIR393B* promoter activity upon NaCl treatment in *AtMIR393Bpro::GUS* plants.** (A) Seven dpg *AtMIR393Bpro::GUS* seedlings were transferred to liquid ATS medium supplemented with increasing concentrations of NaCl for 2 h. GUS activity was revealed after incubation with X-Gluc at 37°C. GUS staining in representative leaves and root segments are shown. (B) Relative transcript level of GUS upon 200 mM NaCl treatment as described in (A). The control value is arbitrarily set to

1 in each case. Data are mean values ( $\pm$ SE) of three independent experiments.

(TIF)

**Figure S6 Salinity effect on *HSpro:AXR3NT-GUS* and *DR5pro:GUS* in *mir393ab* background.** Seven dpG seedlings were incubated in liquid ATS medium with increasing concentrations of NaCl for 4 h and then subjected to GUS staining. Representative photographs of root tips of *mir393ab HSpro:AXR3NT-GUS* (A) and *mir393ab DR5pro:GUS* (B). In (A) seedlings were previously treated for 2 h at 37°C. The control value is arbitrarily set to 1 in each case. Data are mean values of three independent experiments.

(TIF)

**Figure S7 miR393 levels during salinity in roots.** Small RNA blot hybridization of RNA (25  $\mu$ g) from roots and shoots of 7 dpG seedlings treated with 200 mM NaCl for designated times. Probed sRNAs are indicated on the right. The signal detected in mutants relative to control is normalized to signals for the unrelated miR171. The control value is arbitrarily set to 1 in each case.

(TIF)

**Figure S8 *tir1 afb2* and *mir393ab* root morphological responses.** Four dpG WT, *mir393ab* and *tir1 afb2* seedlings were transferred onto ATS medium containing 75 mM NaCl. Representative photographs of *tir1afb2* seedlings after 5 d of treatment are shown in (A). LRs were quantified at designed times (B). (C) PR length of WT, *mir393ab* and *tir1afb2* seedlings was measured after 5 d of treatment. Data are mean values ( $\pm$ SE) of three independent experiments.

(TIF)

**Figure S9 *mir393ab* morphological response in leaves.** WT and *mir393ab* seedlings were grown in ATS medium supplemented with or without 75 mM NaCl in horizontal position. Rosette area was measured after 12 d of treatment by finding the minimal circle area that contained all leaves. Data are mean values ( $\pm$ SE) of three independent experiments. Different letters indicate a significant difference at  $P \leq 0.05$  (Tukey test).

(TIF)

## References

- Takeda S, Matsuoka M (2008) Genetic approaches to crop improvement: Responding to environmental and population changes. *Nat Rev Genet* 9: 444–457.
- Park JE, Park JY, Kim YS, Staswick PE, Jeon J, et al. (2007) GH3-mediated auxin homeostasis links growth regulation with stress adaptation response in Arabidopsis. *J of Biol Chem* 282: 10036–10046.
- Wolters H, Jurgens G (2009) Survival of the flexible: hormonal growth control and adaptation in plant development. *Nat Rev Genet* 10: 305–317.
- Gray WM, Kepinski S, Rouse D, Leyser O, Estelle M (2001) Auxin regulates SCF(TIR1)-dependent degradation of AUX/IAA proteins. *Nature* 414: 271–276.
- Dharmasiri N, Dharmasiri S, Estelle M (2005) The F-box protein TIR1 is an auxin receptor. *Nature* 435: 441–445.
- Dharmasiri N, Dharmasiri S, Weijers D, Lechner E, Yamada M, et al. (2005) Plant development is regulated by a family of auxin receptor F box proteins. *Dev Cell* 9: 109–119.
- Kepinski S, Leyser O (2005) The Arabidopsis F-box protein TIR1 is an auxin receptor. *Nature* 435: 446–451.
- Hagen G, Guilfoyle T (2002) Auxin-responsive gene expression: genes, promoters and regulatory factors. *Plant Mol Biol* 49: 373–385.
- Parry G, Calderon-Villalobos LI, Prigge M, Peret B, Dharmasiri S, et al. (2009) Complex regulation of the TIR1/AFB family of auxin receptors. *Proc Natl Acad Sci U S A* 106: 22540–22545.
- Calderon Villalobos LI, Lee S, De Oliveira C, Ivetac A, Brandt W, et al. (2012) A combinatorial TIR1/AFB-Aux/IAA co-receptor system for differential sensing of auxin. *Nat Chem Biol* 8: 477–485.
- Chen ZH, Bao ML, Sun YZ, Yang YJ, Xu XH, et al. (2011) Regulation of auxin response by miR393-targeted transport inhibitor response protein 1 is involved in normal development in Arabidopsis. *Plant Mol Biol* 77: 619–629.
- Windels D, Vazquez F (2011) miR393: integrator of environmental cues in auxin signaling? *Plant Signal Behav* 6: 1672–1675.
- Navarro L, Dunoyer P, Jay F, Arnold B, Dharmasiri N, et al. (2006) A plant miRNA contributes to antibacterial resistance by repressing auxin signaling. *Science* 312: 436–439.
- Vidal EA, Araus V, Lu C, Parry G, Green PJ, et al. (2010) Nitrate-responsive miR393/AFB3 regulatory module controls root system architecture in Arabidopsis thaliana. *Proc Natl Acad Sci U S A* 107: 4477–4482.
- Si-Ammour A, Windels D, Arn-Boudloires E, Kutter C, Ailhas J, et al. (2011) miR393 and secondary siRNAs regulate expression of the TIR1/AFB2 auxin receptor clade and auxin-related development of Arabidopsis leaves. *Plant Physiol* 157: 683–691.
- Miller G, Suzuki N, Ciftci-Yilmaz S, Mittler R (2010) Reactive oxygen species homeostasis and signalling during drought and salinity stresses. *Plant Cell Environ* 33: 453–467.
- Tognetti VB, Muhlenbock P, Van Breusegem F (2012) Stress homeostasis - the redox and auxin perspective. *Plant Cell Environ* 35: 321–333.
- Iglesias M, Terrile M, Bartoli C, D'Ippolito S, Casaloguec C (2010) Auxin signaling participates in the adaptive response against oxidative stress and salinity by interacting with redox metabolism in Arabidopsis. *Plant Mol Biol* 74: 215–222.
- Cheong YH, Chang HS, Gupta R, Wang X, Zhu T, et al. (2002) Transcriptional profiling reveals novel interactions between wounding, pathogen, abiotic stress, and hormonal responses in Arabidopsis. *Plant Physiol* 129: 661–677.

**Figure S10**  $O_2^-$  level in *mir393ab* mutant under salinity. Fourteen dpG WT and *mir393ab* leaves were transferred onto liquid ATS medium supplemented with 100 mM NaCl. After 12 h of initial treatment in situ  $O_2^-$  accumulation was detected by NBT staining. Representative photographs are shown.

(TIF)

**Figure S11** Analysis of single mutants *mir393a* and *mir393b*. (A) Seven dpG seedlings were subjected to 200 mM NaCl treatment for 4 h. Relative transcript level of TIR1 upon treatment was measured by RT-PCR. The control value is arbitrarily set to 1 in each case. Data are mean values ( $\pm$ SE) of three independent experiments. (B) Four dpG seedlings were transferred onto ATS medium containing 75 mM NaCl. LR were quantified after 5 d of treatment. Data are mean values ( $\pm$ SE) of three independent experiments. (C) Seven dpG seedlings were treated with 100 mM NaCl for 3 d. Chlorophyll content was measured and expressed as percentage of untreated seedlings. Data are mean values ( $\pm$ SE) of three independent experiments. Different letters indicate a significant difference at  $P \leq 0.05$  (Tukey test).

(TIF)

**Table S1 Antioxidant levels in WT and *mir393ab* plants under salinity.** Seven dpG WT and *mir393ab* seedlings were subjected to 100 mM NaCl treatment. After 12 h, AA and GSH levels were quantified. Data are mean values ( $\pm$ SE) of three independent experiments. Different letters indicate significant difference at  $P \leq 0.05$  (Tukey test).

(TIF)

## Acknowledgments

We thank Dr. J Palatnik for the *ago1-27* mutant and Natalia Correa-Aragunde for valuable discussions and suggestions on our manuscript. MCT and CAC are members of the research staff of CONICET. MJI is a graduate fellow of the same institution.

## Author Contributions

Conceived and designed the experiments: MJI MCT FV ME CAC. Performed the experiments: MJI MCT DW MCL CB. Analyzed the data: MJI MCT DW MCL CB FV ME CAC. Contributed reagents/materials/analysis tools: MJI MCT DW MCL CB FV ME CAC. Wrote the paper: MJI CAC FV.

20. Jain M, Khurana JP (2009) Transcript profiling reveals diverse roles of auxin-responsive genes during reproductive development and abiotic stress in rice. *Febs J* 276: 3148–3162.
21. Van Hoewyk D, Takahashi H, Inoue E, Hess A, Tamaoki M, et al. (2008) Transcriptome analyses give insights into selenium-stress responses and selenium tolerance mechanisms in Arabidopsis. *Physiol Plant* 132: 236–253.
22. Blomster T, Salojärvi J, Sipari N, Brosche M, Ahlfors R, et al. (2011) Apoplastic reactive oxygen species transiently decrease auxin signaling and cause stress-induced morphogenic response in Arabidopsis. *Plant Physiol* 157: 1866–1883.
23. Ruegger M, Dewey E, Gray WM, Hobbie L, Turner J, et al. (1998) The TIR1 protein of Arabidopsis functions in auxin response and is related to human SKP2 and yeast grr1p. *Genes Dev* 12: 198–207.
24. Savaldi-Goldstein S, Baiga TJ, Pojer F, Dabi T, Butterfield C, et al. (2008) New auxin analogs with growth-promoting effects in intact plants reveal a chemical strategy to improve hormone delivery. *Proc Natl Acad Sci U S A* 105: 15190–15195.
25. Morel JB, Godon C, Mourrain P, Beclin C, Boutet S, et al. (2002) Fertile hypomorphic ARGONAUTE (agol) mutants impaired in post-transcriptional gene silencing and virus resistance. *Plant Cell* 14: 629–639.
26. Windels D, Bielewicz D, Ebneter M, Jarmolowski A, Szweykowska-Kulinska Z, et al. (2014) miR393 Is Required for Production of Proper Auxin Signalling Outputs. *PLoS One* 9: e95972.
27. Ulmasov T, Murfett J, Hagen G, Guilfoyle TJ (1997) Aux/IAA proteins repress expression of reporter genes containing natural and highly active synthetic auxin response elements. *Plant Cell* 9: 1963–1971.
28. Oono Y, Chen QG, Overvoorde PJ, Kohler C, Theologis A (1998) age Mutants of Arabidopsis exhibit altered auxin-regulated gene expression. *Plant Cell* 10: 1649–1662.
29. Terrile MC, Paris R, Calderon-Villalobos LI, Iglesias MJ, Lamattina L, et al. (2012) Nitric oxide influences auxin signaling through S-nitrosylation of the Arabidopsis TRANSPORT INHIBITOR RESPONSE 1 auxin receptor. *Plant J* 70: 492–500.
30. Wilson AK, Pickett FB, Turner JC, Estelle M (1990) A dominant mutation in Arabidopsis confers resistance to auxin, ethylene and abscisic acid. *Mol Gen Genet* 222: 377–383.
31. Malamy JE, Benfey PN (1997) Organization and cell differentiation in lateral roots of Arabidopsis thaliana. *Dev* 124: 33–44.
32. Rahman A, Bannigan A, Sulaman W, Pechter P, Blancaflor EB, et al. (2007) Auxin, actin and growth of the Arabidopsis thaliana primary root. *Plant J* 50: 514–528.
33. Vazquez F, Blevins T, Ailhas J, Boller T, Meins F Jr (2008) Evolution of Arabidopsis MIR genes generates novel microRNA classes. *Nucleic Acids Res* 36: 6429–6438.
34. Arnon DI (1949) Copper Enzymes in Isolated Chloroplasts. Polyphenoloxidase in Beta Vulgaris. *Plant Physiol* 24: 1–15.
35. Jabs T, Dietrich RA, Dangel JL (1996) Initiation of runaway cell death in an Arabidopsis mutant by extracellular superoxide. *Science* 273: 1853–1856.
36. Bellincampi D, Dipierro N, Salvi G, Cervone F, De Lorenzo G (2000) Extracellular H<sub>2</sub>O<sub>2</sub> induced by oligogalacturonides is not involved in the inhibition of the auxin-regulated rolB gene expression in tobacco leaf explants. *Plant Physiol* 122: 1379–1385.
37. Bradford M (1976) A rapid and sensitive method for the quantitation of micrograms quantities of protein utilizing the principle of protein-dye binding. *Anal Biochem* 72: 248–254.
38. Gergoff G, Chaves A, Bartoli CG (2010) Ethylene regulates ascorbic acid content during dark-induced leaf senescence. *Plant Sci* 178: 207–212.
39. Griffith OW (1980) Determination of glutathione and glutathione disulfide using glutathione reductase and 2-vinylpyridine. *Analytical Biochemistry* 106: 207–212.
40. Estelle M (2008) Phenotypic Analysis of Arabidopsis Mutants: Auxin Hormone Response. *Cold Spring Harbor Protocols* 2008: pdb.prot4965.
41. Kruszka K, Pieczynski M, Windels D, Bielewicz D, Jarmolowski A, et al. (2012) Role of microRNAs and other sRNAs of plants in their changing environments. *J Plant Physiol* 169: 1664–1672.
42. Mallory A, Vaucheret H (2010) Form, function, and regulation of ARGONAUTE proteins. *Plant Cell* 22: 3879–3889.
43. Sunkar R, Zhu JK (2004) Novel and stress-regulated microRNAs and other small RNAs from Arabidopsis. *Plant Cell* 16: 2001–2019.
44. Gustafson AM, Allen E, Givan S, Smith D, Carrington JC, et al. (2005) ASRP: The Arabidopsis Small RNA Project Database. *Nucleic Acids Research* 33: D637–D640.
45. Casimiro I, Beeckman T, Graham N, Bhalerao R, Zhang H, et al. (2003) Dissecting Arabidopsis lateral root development. *Trends Plant Sci* 8: 165–171.
46. Duan L, Dietrich D, Ng CH, Chan PMY, Bhalerao R, et al. (2013) Endodermal ABA Signaling Promotes Lateral Root Quiescence during Salt Stress in Arabidopsis Seedlings. *Plant Cell* 25: 324–341.
47. Guan Q, Wu J, Yue X, Zhang Y, Zhu J (2013) A Nuclear Calcium-Sensing Pathway Is Critical for Gene Regulation and Salt Stress Tolerance in Arabidopsis. *PLoS Genet* 9: e1003755.
48. Zhang SW, Li CH, Cao J, Zhang YC, Zhang SQ, et al. (2009) Altered architecture and enhanced drought tolerance in rice via the down-regulation of indole-3-acetic acid by TLD1/OsGH3.13 activation. *Plant Physiol* 151: 1889–1901.
49. Wang Y, Li K, Li X (2009) Auxin redistribution modulates plastic development of root system architecture under salt stress in Arabidopsis thaliana. *J Plant Physiol* 166: 1637–1645.
50. Zhao Y, Wang T, Zhang W, Li X (2011) SOS3 mediates lateral root development under low salt stress through regulation of auxin redistribution and maxima in Arabidopsis. *New Phytol* 189: 1122–1134.
51. Potters G, Pasternak TP, Guisez Y, Palme KJ, Jansen MA (2007) Stress-induced morphogenic responses: growing out of trouble? *Trends Plant Sci* 12: 98–105.
52. Potters G, Horemans N, Jansen MA (2010) The cellular redox state in plant stress biology—a charging concept. *Plant Physiol Biochem* 48: 292–300.
53. Burssens S, Himanen K, van de Cotte B, Beeckman T, Van Montagu M, et al. (2000) Expression of cell cycle regulatory genes and morphological alterations in response to salt stress in Arabidopsis thaliana. *Planta* 211: 632–640.
54. He X-J, Mu R-L, Cao W-H, Zhang Z-G, Zhang J-S, et al. (2005) AtNAC2, a transcription factor downstream of ethylene and auxin signaling pathways, is involved in salt stress response and lateral root development. *Plant J* 44: 903–916.
55. Zolla G, Heimer YM, Barak S (2010) Mild salinity stimulates a stress-induced morphogenic response in Arabidopsis thaliana roots. *J Exp Bot* 61: 211–224.
56. Reed RC, Brady SR, Muday GK (1998) Inhibition of auxin movement from the shoot into the root inhibits lateral root development in Arabidopsis. *Plant Physiol* 118: 1369–1378.
57. Dubrovsky JG, Sauer M, Napsucially-Mendivil S, Ivanchenko MG, Friml J, et al. (2008) Auxin acts as a local morphogenetic trigger to specify lateral root founder cells. *Proc Natl Acad Sci U S A* 105: 8790–8794.
58. Geng Y, Wu R, Wee CW, Xie F, Wei X, et al. (2013) A Spatio-Temporal Understanding of Growth Regulation during the Salt Stress Response in Arabidopsis. *Plant Cell* 25: 2132–2154.
59. Feng X-M, You C-X, Qiao Y, Mao K, Hao Y-J (2010) Ectopic overexpression of Arabidopsis AtmiR393a gene changes auxin sensitivity and enhances salt resistance in tobacco. *Acta Physiol Plant* 32: 997–1003.
60. Sunkar R, Chinnusamy V, Zhu J, Zhu JK (2007) Small RNAs as big players in plant abiotic stress responses and nutrient deprivation. *Trends Plant Sci* 12: 301–309.
61. Mendoza-Soto AB, Sanchez F, Hernandez G (2012) MicroRNAs as regulators in plant metal toxicity response. *Front Plant Sci* 3: 105.
62. Van Breusegem F, Dat JF (2006) Reactive Oxygen Species in Plant Cell Death. *Plant Physiol* 141: 384–390.
63. Mittler R, Vanderauwera S, Gollery M, Van Breusegem F (2004) Reactive oxygen gene network of plants. *Trends Plant Sci* 9: 490–498.
64. Apel K, Hirt H (2004) REACTIVE OXYGEN SPECIES: Metabolism, oxidative stress, and signal transduction. *Ann Rev Plant Biol* 55: 373–379.
65. Ma F, Wang L, Li J, Samma M, Xie Y, et al. (2013) Interaction between HY1 and H2O2 in auxin-induced lateral root formation in Arabidopsis. *Plant Mol Biol* 1–13.
66. Wang P, Du Y, Li Y, Ren D, Song C-P (2010) Hydrogen Peroxide-Mediated Activation of MAP Kinase 6 Modulates Nitric Oxide Biosynthesis and Signal Transduction in Arabidopsis. *Plant Cell* 22: 2981–2998.
67. Li S-W, Xue L, Xu S, Feng H, An L (2009) IBA-induced changes in antioxidant enzymes during adventitious rooting in mung bean seedlings: The role of H2O2. *Environ Exp Bot* 66: 442–450.
68. Bai M-Y, Fan M, Oh E, Wang Z-Y (2012) A Triple Helix-Loop-Helix/Basic Helix-Loop-Helix Cascade Controls Cell Elongation Downstream of Multiple Hormonal and Environmental Signaling Pathways in Arabidopsis. *Plant Cell* 24: 4917–4929.
69. Joo JH, Bae Y, Lee JS (2001) Role of Auxin-Induced Reactive Oxygen Species in Root Gravitropism. *Plant Physiol* 126: 1055–1060.
70. Schöpfer P, Liskay A, Bechtold M, Frahy G, Wagner A (2002) Evidence that hydroxyl radicals mediate auxin-induced extension growth. *Planta* 214: 821–828.
71. Joo JH, Wang S, Chen JG, Jones AM, Fedoroff NV (2005) Different signaling and cell death roles of heterotrimeric G protein  $\alpha$  and  $\beta$  subunits in the Arabidopsis oxidative stress response to ozone. *Plant Cell* 17: 957–970.
72. Peer WA, Cheng Y, Murphy AS (2013) Evidence of oxidative attenuation of auxin signalling. *J Exp Bot* 64: 2629–2639.
73. Correa-Aragunde N, Foresi N, Delledonne M, Lamattina L (2013) Auxin induces redox regulation of ascorbate peroxidase activity by S-nitrosylation/denitrosylation balance resulting in changes of root growth pattern in Arabidopsis. *J Exp Bot* 64: 3339–3349.
74. Barth C, Moeder W, Klessig DF, Conklin PL (2004) The Timing of Senescence and Response to Pathogens Is Altered in the Ascorbate-Deficient Arabidopsis Mutant vitamin c-1. *Plant Physiol* 134: 1784–1792.
75. Foyer CH, Noctor G (2005) Redox homeostasis and antioxidant signaling: a metabolic interface between stress. *Plant Cell* 17: 1866–1875.
76. Davletova S, Rizhsky L, Liang H, Shengqi Z, Oliver DJ, et al. (2005) Cytosolic Ascorbate Peroxidase 1 Is a Central Component of the Reactive Oxygen Gene Network of Arabidopsis. *Plant Cell* 17: 268–281.
77. Zhang Z, Zhang Q, Wu J, Zheng X, Zheng S, et al. (2013) Gene Knockout Study Reveals That Cytosolic Ascorbate Peroxidase 2 (OsAPX2) Plays a Critical Role in Growth and Reproduction in Rice under Drought, Salt and Cold Stresses. *PLoS One* 8: e57472.
